# Supplementary material
Source: publisher figshare collection journal article supplement (https://diabetesjournals.figshare.com/ndownloader/files/34588568)
Supplement: Supplementary file 1 [file 34588568]

---

## **Associations of Serum Carotenoids with Risk of Cardiovascular Mortality among Patients with Type 2 Diabetes**

Zixin Qiu,<sup>#</sup>, Xue Chen,<sup>#</sup>, Tingting Geng, Zhenzhen Wan, Qi Lu, Lin Li, Kai Zhu, Xuena Zhang, Yujie Liu, Xiaoyu Lin, Liangkai Chen, Zhilei Shan, Liegang Liu, An Pan, Gang Liu

<sup>#</sup>Contributed equally as co-first authors

### **Online Supplementary Material**

**Supplementary Figure 1.** Flowchart of the study participants

**Supplementary Table 1.** HRs (95% CIs) of CVD mortality according to quartiles of serum total carotenoids concentrations among patients with type 2 diabetes in NHANES III and NHANES 2001–2006

**Supplementary Table 2.** HRs (95% CIs) of CVD mortality according to quartiles of serum  $\beta$ -carotene concentrations among type 2 diabetes after excluding participants who died within two years of follow-up in NHANES III and NHANES 2001–2006

**Supplementary Table 3.** HRs (95% CIs) of CVD mortality according to quartiles of serum  $\beta$ -carotene concentrations among patients with type 2 diabetes with further adjustment of dietary factors and serum nutrient biomarkers in NHANES III and NHANES 2001–2006

**Supplementary Table 4.** HRs (95% CIs) of CVD mortality according to quartiles of serum  $\beta$ -carotene concentrations among patients with type 2 diabetes without mutual adjustment of carotenoids in NHANES III and NHANES 2001–2006

**Supplementary Table 5.** HRs (95% CIs) of CVD mortality according to quartiles of dietary carotenoids intakes among patients with type 2 diabetes in NHANES 2001–2014

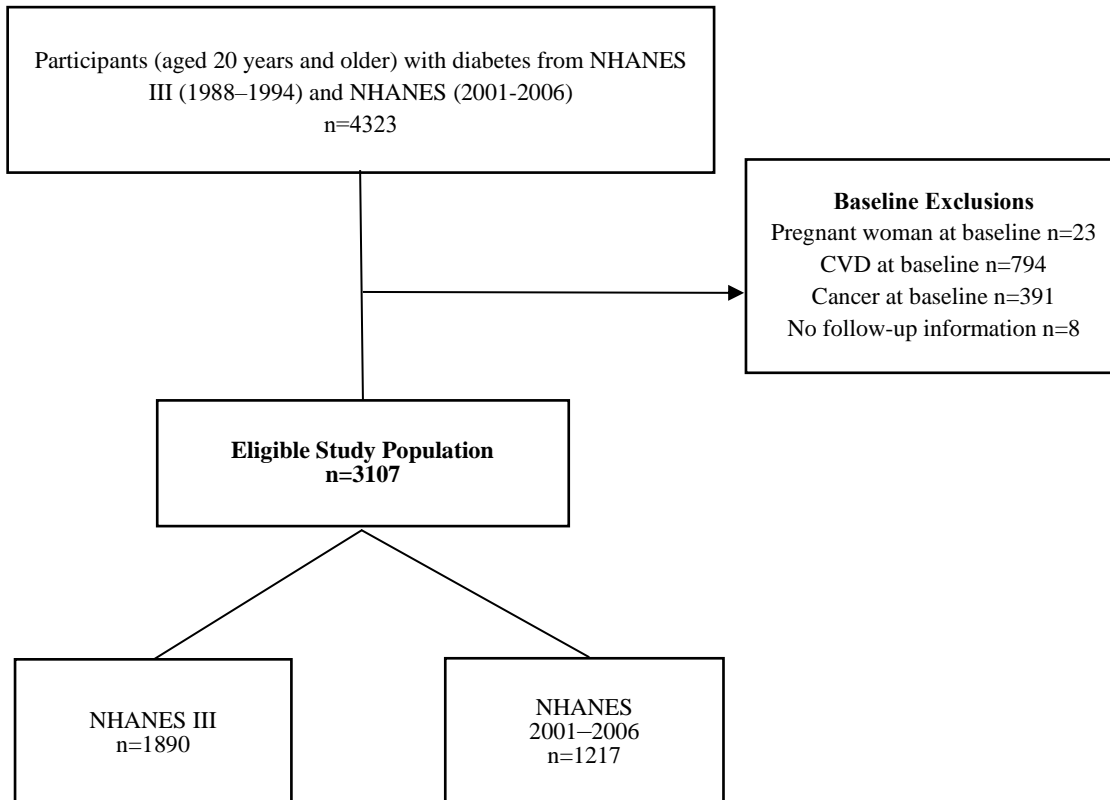

**Supplementary Figure 1.** Flowchart of the study participants

**Supplementary Table 1.** HRs (95% CIs) of CVD mortality according to quartiles of serum total carotenoids concentrations among patients with type 2 diabetes in NHANES III and NHANES 2001–2006

|                  | Serum total carotenoids (nmol/L) |                   |                   |                   | <i>P</i> trend |
|------------------|----------------------------------|-------------------|-------------------|-------------------|----------------|
|                  | Q1                               | Q2                | Q3                | Q4                |                |
| Range            | <960.0                           | 960.0–1321.0      | 1321.1–1800.1     | >1800.1           |                |
| No. deaths/total | 91/673                           | 98/666            | 106/670           | 107/669           |                |
| Model 1          | 1                                | 1.30 (0.88, 1.92) | 1.42 (1.01, 1.92) | 1.46 (1.01, 2.10) | 0.084          |
| Model 2          | 1                                | 1.38 (0.91, 2.10) | 1.56 (1.14, 2.15) | 1.47 (0.96, 2.27) | 0.036          |
| Model 3          | 1                                | 1.34 (0.89, 1.99) | 1.42 (1.05, 1.92) | 1.48 (0.96, 2.28) | 0.140          |

**Model 1:** adjusted for age (continuous), sex (male, or female), and race/ethnicity (non-Hispanic white, or other).

**Model 2:** model 1 + BMI (continuous), education level (less than high school, high school or equivalent, or college or above), family income-poverty ratio ( $\leq 1.0$ , 1.0–3.0, or  $> 3.0$ ), drinking status (nondrinker, low to moderate drinker, or heavy drinker), smoking status (never smoker, former smoker, or current smoker), leisure-time moderate-to-vigorous physical activity (inactive group, insufficiently active group, or active group), HEI (in quartiles), total energy intakes (in quartiles), and supplement use (yes, or no).

**Model 3:** model 2 + diabetes medication use (yes, or no), diabetes duration ( $< 3$ , 3–10,  $> 10$  years), HbA<sub>1c</sub> ( $< 7\%$ , or  $\geq 7\%$ ), self-reported hypertension (yes, or no), serum total cholesterol (in quintiles), and triglycerides (in quintiles).

**Supplementary Table 2.** HRs (95% CIs) of CVD mortality according to quartiles of serum  $\beta$ -carotene concentrations among type 2 diabetes after excluding participants who died within two years of follow-up in NHANES III and NHANES 2001–2006 (n=2987)

|                  | Serum $\beta$ -carotene (nmol/L) |                   |                   |                   | <i>P</i> <sub>trend</sub> |
|------------------|----------------------------------|-------------------|-------------------|-------------------|---------------------------|
|                  | Q1<br><148.4                     | Q2<br>148.4–240.0 | Q3<br>240.1–429.9 | Q4<br>>429.9      |                           |
| No. deaths/total | 67/746                           | 91/746            | 105/748           | 137/747           |                           |
| Model 1          | 1                                | 1.51 (0.82, 2.77) | 1.91 (1.03, 3.53) | 2.34 (0.52, 3.60) | <0.001                    |
| Model 2          | 1                                | 1.58 (0.90, 2.79) | 1.94 (1.05, 3.59) | 2.27 (1.39, 3.71) | 0.018                     |
| Model 3          | 1                                | 1.52 (0.86, 2.67) | 2.17 (1.21, 3.89) | 2.43 (1.58, 3.75) | 0.005                     |

**Model 1:** adjusted for age (continuous), sex (male, or female), and race/ethnicity (non-Hispanic white, or other).

**Model 2:** model 1 + BMI (continuous), education level (less than high school, high school or equivalent, or college or above), family income-poverty ratio ( $\leq 1.0$ , 1.0–3.0, or  $> 3.0$ ), drinking status (nondrinker, low-to -moderate drinker or heavy drinker), smoking status (never smoker, former smoker, or current smoker), leisure-time moderate-to-vigorous physical activity (inactive group, insufficiently active group, or active group), HEI (in quartiles), total energy intakes (in quartiles), supplement use (yes, or no), and serum  $\alpha$ -carotene,  $\beta$ -cryptoxanthin, lutein + zeaxanthin, and lycopene (all natural log-transformed).

**Model 3:** model 2 + diabetes medication use (yes, or no), diabetes duration ( $< 3$ , 3–10,  $> 10$  years), HbA<sub>1c</sub> ( $< 7\%$ , or  $\geq 7\%$ ), self-reported hypertension (yes, or no), serum total cholesterol (in quintiles), and triglycerides (in quintiles).

**Supplementary Table 3.** HRs (95% CIs) of CVD mortality according to quartiles of serum  $\beta$ -carotene concentrations among patients with type 2 diabetes with further adjustment of dietary factors and serum nutrient biomarkers in NHANES III and NHANES 2001–2006

|                                          | Serum $\beta$ -carotene (nmol/L) |                   |                   |                   | <i>P</i> trend |
|------------------------------------------|----------------------------------|-------------------|-------------------|-------------------|----------------|
|                                          | Q1<br><148.4                     | Q2<br>148.4–240.0 | Q3<br>240.1–424.9 | Q4<br>>424.9      |                |
| Model 1*                                 | 1                                | 1.43 (0.85, 2.42) | 2.16 (1.24, 3.75) | 2.47 (1.62, 3.76) | 0.002          |
| Model 1+dietary $\beta$ -carotene intake | 1                                | 1.36 (0.80, 2.31) | 1.92 (1.11, 3.31) | 2.20 (1.41, 3.44) | 0.004          |
| Model 1+dietary factors †                | 1                                | 1.34 (0.80, 2.24) | 1.97 (1.17, 3.32) | 2.19 (1.42, 3.38) | 0.006          |
| Model 1+nutrient biomarkers ‡            | 1                                | 1.42 (0.85, 2.37) | 2.16 (1.25, 3.73) | 2.32 (1.48, 3.63) | 0.010          |

\*Model 1 was adjusted for age (continuous), sex (male, or female), and race/ethnicity (non-Hispanic white, or other), BMI (continuous), education level (less than high school, high school or equivalent, or college or above), family income-poverty ratio ( $\leq 1.0$ , 1.0–3.0, or  $> 3.0$ ), drinking status (nondrinker, low-to-moderate drinker, or heavy drinker), smoking status (never smoker, former smoker, or current smoker), leisure-time moderate-to-vigorous physical activity (inactive group, insufficiently active group, or active group), HEI (in quartiles), total energy intakes (in quartiles), supplement use (yes, or no), serum total cholesterol (in quintiles), triglycerides (in quintiles), diabetes medication use (yes, or no), diabetes duration ( $< 3$ , 3–10, or  $> 10$  years), HbA<sub>1c</sub> ( $< 7\%$ , or  $\geq 7\%$ ), self-reported hypertension (yes, or no), serum  $\alpha$ -carotene,  $\beta$ -cryptoxanthin, lutein + zeaxanthin, and lycopene (all natural log-transformed).

† Further adjusted for intakes of vegetables, fruits, total polyunsaturated fatty acids, total monounsaturated fatty acids, total saturated fatty acids, cholesterol, vitamin A, vitamin E, vitamin C and fiber (all in quintiles), There were 127 missing values for all these variables.

‡ Further adjusted for serum vitamin A, vitamin E, vitamin C and 25-hydroxyvitamin D levels (all in quintiles). There were 487 missing values for serum vitamin C levels.

**Supplementary Table 4.** HRs (95% CIs) of CVD mortality according to quartiles of serum  $\beta$ -carotene concentrations among patients with type 2 diabetes without mutual adjustment of carotenoids in NHANES III and NHANES 2001–2006

|         | Serum $\beta$ -carotene (nmol/L) |                   |                   |                   | <i>P</i> <sub>trend</sub> |
|---------|----------------------------------|-------------------|-------------------|-------------------|---------------------------|
|         | Q1<br><148.4                     | Q2<br>148.4–240.0 | Q3<br>240.1–424.9 | Q4<br>>424.9      |                           |
| Crude   | 1                                | 1.43 (0.83, 2.47) | 1.83 (1.04, 3.22) | 2.23 (1.49, 3.34) | <0.001                    |
| Model 1 | 1                                | 1.35 (0.84, 2.17) | 1.52 (0.95, 2.42) | 1.69 (1.22, 2.33) | 0.023                     |
| Model 2 | 1                                | 1.23 (0.75, 2.02) | 1.57 (0.98, 2.51) | 1.67 (1.18, 2.37) | 0.024                     |

**Model 1:** adjusted for age (continuous), sex (male, or female), and race/ethnicity (non-Hispanic white, or other).

**Model 2:** model 1 + BMI (continuous), education level (less than high school, high school or equivalent, or college or above), family income-poverty ratio ( $\leq 1.0$ , 1.0–3.0, or  $> 3.0$ ), drinking status (nondrinker, low-to-moderate drinker or heavy drinker), smoking status (never smoker, former smoker, or current smoker), leisure-time moderate-to-vigorous physical activity (inactive group, insufficiently active group, or active group), HEI (in quartiles), total energy intakes (in quartiles), and supplement use (yes, or no).

**Model 3:** model 2 + diabetes medication use (yes, or no), diabetes duration ( $< 3$ , 3–10,  $> 10$  years), HbA<sub>1c</sub> ( $< 7\%$ , or  $\geq 7\%$ ), self-reported hypertension (yes, or no), serum total cholesterol (in quintiles), and triglycerides (in quintiles).

**Supplementary Table 5.** HRs (95% CIs) of CVD mortality according to quartiles of dietary carotenoids intakes among patients with type 2 diabetes in NHANES 2001–2014 (n=3686)

|                          | Quartiles of dietary intake (µg/day) |                   |                   |                   | <i>P</i> <sub>trend</sub> |
|--------------------------|--------------------------------------|-------------------|-------------------|-------------------|---------------------------|
|                          | Q1                                   | Q2                | Q3                | Q4                |                           |
| <b>α-carotene</b>        |                                      |                   |                   |                   |                           |
| Range                    | <14.0                                | 14.0–51.0         | 51.1–274.0        | >274.0            |                           |
| No. deaths/total         | 31/918                               | 28/932            | 31/915            | 22/921            |                           |
| Crude                    | 1                                    | 1.00 (0.49, 2.01) | 0.83 (0.41, 1.71) | 0.55 (0.28, 1.08) | 0.056                     |
| Multivariable adjusted*  | 1                                    | 0.80 (0.38, 1.69) | 0.62 (0.29, 1.33) | 0.40 (0.17, 0.91) | 0.030                     |
| <b>β-carotene</b>        |                                      |                   |                   |                   |                           |
| Range                    | <279.0                               | 279.0–753.0       | 753.1–2249.0      | >2249.0           |                           |
| No. deaths/total         | 30/923                               | 30/920            | 26/922            | 26/921            |                           |
| Crude                    | 1                                    | 1.42 (0.76, 2.63) | 1.43 (0.69, 2.98) | 1.07 (0.49, 2.34) | 0.724                     |
| Multivariable adjusted*  | 1                                    | 2.14 (1.05, 4.38) | 1.95 (0.79, 4.19) | 1.40 (0.47, 4.19) | 0.622                     |
| <b>β-cryptoxanthin</b>   |                                      |                   |                   |                   |                           |
| Range                    | <7.0                                 | 7.0–28.0          | 28.1–103.0        | >103.0            |                           |
| No. deaths/total         | 27/929                               | 25/925            | 26/908            | 34/924            |                           |
| Crude                    | 1                                    | 0.95 (0.44, 2.04) | 0.97 (0.47, 2.04) | 0.96 (0.50, 1.86) | 0.966                     |
| Multivariable adjusted*  | 1                                    | 0.93 (0.45, 1.92) | 0.83 (0.43, 1.62) | 0.76 (0.35, 1.64) | 0.595                     |
| <b>Lycopene</b>          |                                      |                   |                   |                   |                           |
| Range                    | 0.0                                  | 1.0–1261.0        | 1261.1–4902.0     | >4902.0           |                           |
| No. deaths/total         | 47/1007                              | 20/836            | 23/922            | 22/921            |                           |
| Crude                    | 1                                    | 0.45 (0.23, 0.86) | 0.56 (0.31, 1.01) | 0.64 (0.34, 1.18) | 0.673                     |
| Multivariable adjusted*  | 1                                    | 0.41 (0.19, 0.87) | 0.60 (0.30, 1.20) | 0.56 (0.27, 1.13) | 0.607                     |
| <b>Lutein/zeaxanthin</b> |                                      |                   |                   |                   |                           |
| Range                    | <330.0                               | 330.0–663.0       | 663.1–1333.0      | >1333.0           |                           |
| No. deaths/total         | 22/920                               | 34/923            | 28/922            | 28/921            |                           |
| Crude                    | 1                                    | 1.97 (1.01, 3.84) | 1.06 (0.50, 2.23) | 1.79 (0.92, 3.46) | 0.319                     |
| Multivariable adjusted*  | 1                                    | 1.70 (0.85, 3.41) | 1.01 (0.45, 2.25) | 1.97 (0.66, 5.84) | 0.375                     |

\*Adjusted for age (continuous), sex (male, or female), and race/ethnicity (non-Hispanic white, or other), BMI (continuous), education level (less than high school, high school or equivalent, or college or above), family income-poverty ratio ( $\leq 1.0$ , 1.0–3.0, or  $> 3.0$ ), drinking status (nondrinker, low-to-moderate drinker or heavy drinker), smoking status (never smoker, former smoker, or current smoker), leisure-time moderate-to-vigorous physical activity (inactive group, insufficiently active group, or active group), HEI, intakes of total energy, vitamin C, vitamin A, vitamin E, selenium, total cholesterol, total fat, fiber, other dietary carotenoids (all in quartiles), self-reported hypertension (yes, or no) and hypercholesterolemia (yes, or no), diabetes medication use (yes, or no), diabetes duration ( $< 3$ , 3–10,  $> 10$  years), and HbA<sub>1c</sub> ( $< 7\%$ , or  $\geq 7\%$ ).
